# Supplementary material for: Nobiletin Enhances Chemosensitivity to Adriamycin through Modulation of the Akt/GSK3β/β–Catenin/MYCN/MRP1 Signaling Pathway in A549 Human Non-Small-Cell Lung Cancer Cells
Source: MDPI journal article supplement (doi:10.3390/nu10121829), 2018-11-26
Supplement: s1 [file s1]

Supplementary Materials: Nobiletin Enhances A549 Cell Chemosensitivity to Adriamycin through Modulation of the Akt/GSK3β/β-Catenin/MYCN/MRP1 Signaling Pathway in Human Non-Small-Cell Lung Cancer

Jeong Yong Moon, Le Van Manh Hung, Tatsuya Unno and Somi Kim Cho

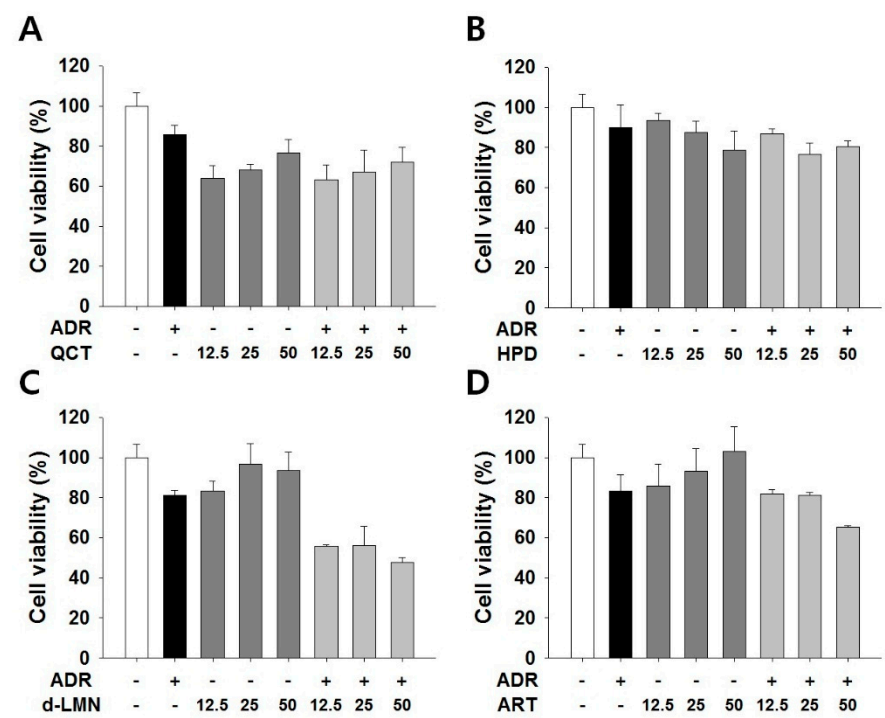

**Figure S1.** Effect of the combined treatment with phytochemicals and ADR on cell proliferation in A549/ADR cells. Cytotoxicity of ADR treated with or without phytochemicals (A) Quercetin; QCT. (B) Hesperidin; HPD. (C) d-Limonene; d-LMN. (D) Auraptene; ART as measured by MTT assay. Representative examples of three independent experiments are shown. Data are expressed as mean ± SD.

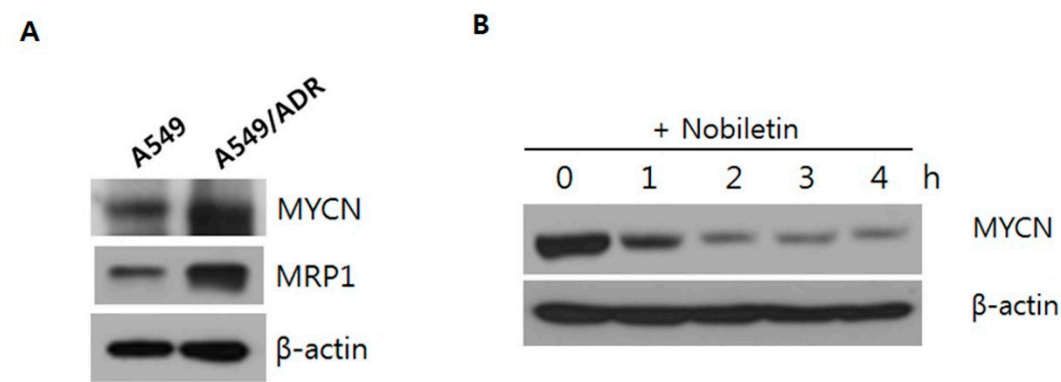

**Figure S2.** MYCN is highly expressed in A549/ADR cells and is down-regulated following NBT treatment. (A) The basal expression levels of MYCN and MRP1 in A549 and A549/ADR cells were shown by Western blotting analysis. (B) Western blotting analysis of MYCN levels after NBT treatment for 1, 2, and 3 h.
